# Supplementary material for: Leukotriene B4 amplifies eosinophil accumulation in response to nematodes
Source: PubMed Central journal article supplement — J Exp Med. 2014 Jun 30;211(7):1281–8. doi: 10.1084/jem.20132336 (PMC4076593; doi:10.1084/jem.20132336), 2014-06-30
Supplement: supp_jem.20132336_JEM_20132336_sm.pdf [file supp_jem.20132336_JEM_20132336_sm.pdf]

## SUPPLEMENTAL MATERIAL

Patnode et al., <http://www.jem.org/cgi/content/full/jem.20132336/DC1>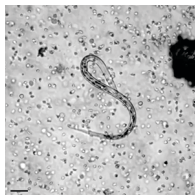

**Video 1.** Time-lapse video of bone marrow-derived eosinophils and a *C. elegans* dauer larva over the course of 80 min. Images were acquired once every 30 s and are displayed at a frame rate of 15/s. Collective migration toward the debris in the top right was not apparent. Stills from this video are shown in Fig. 1. Results represent three independent experiments. Bar, 50  $\mu$ m.

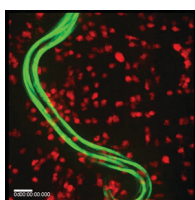

**Video 2.** Time-lapse video of bone marrow-derived eosinophils (red) and a *C. elegans* dauer larva (green) over the course of 60 min. Images were acquired once every 20 s and are displayed at a frame rate of 15/s. At the 54-min time point, the shifting worm carries a large aggregate of eosinophils roughly 100  $\mu$ m to the right. Results represent three independent experiments. Bar, 50  $\mu$ m.

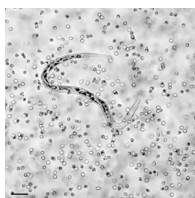

**Video 3.** Time-lapse video of human peripheral blood eosinophils and a *C. elegans* dauer larva over the course of 45 min. Images were acquired once every 15 s and are displayed at a frame rate of 15/s. Results represent two independent experiments, each with cells from a different donor. Bar, 50  $\mu$ m.

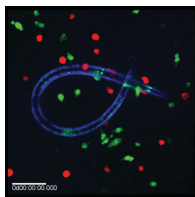

**Video 4.** Time-lapse video of control (green) and PT-treated (red) bone marrow-derived eosinophils and a *C. elegans* dauer larva (blue) over the course of 120 min. Images were acquired once every 60 s and are displayed at a frame rate of 10/s. Fluorescent eosinophils and invisible nonfluorescent control-treated eosinophils make up 30% and 70% of the total cells, respectively. Stills from this video are shown in Fig. 2. Results represent three independent experiments. Bar, 50  $\mu$ m.

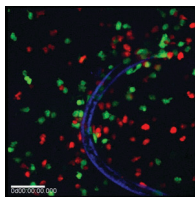

**Video 5.** Time-lapse video of *Alox5*<sup>+/+</sup> (green) and *Alox5*<sup>-/-</sup> (red) bone marrow-derived eosinophils and a *C. elegans* dauer larva (blue) over the course of 60 min. Images were acquired once every 60 s and are displayed at a frame rate of 10/s. Fluorescent eosinophils and invisible nonfluorescent *Alox5*<sup>+/+</sup> eosinophils make up 30% and 70% of the total cells, respectively. Stills from this video are shown in Fig. 3. Results represent two independent experiments. Bar, 50  $\mu$ m.
